# Supplementary material
Source: PubMed Central journal article supplement (PMC3009925)
Supplement: supp_M110.161661_jbc.M110.161661-1.pdf [file supp_M110.161661_jbc.M110.161661-1.pdf]

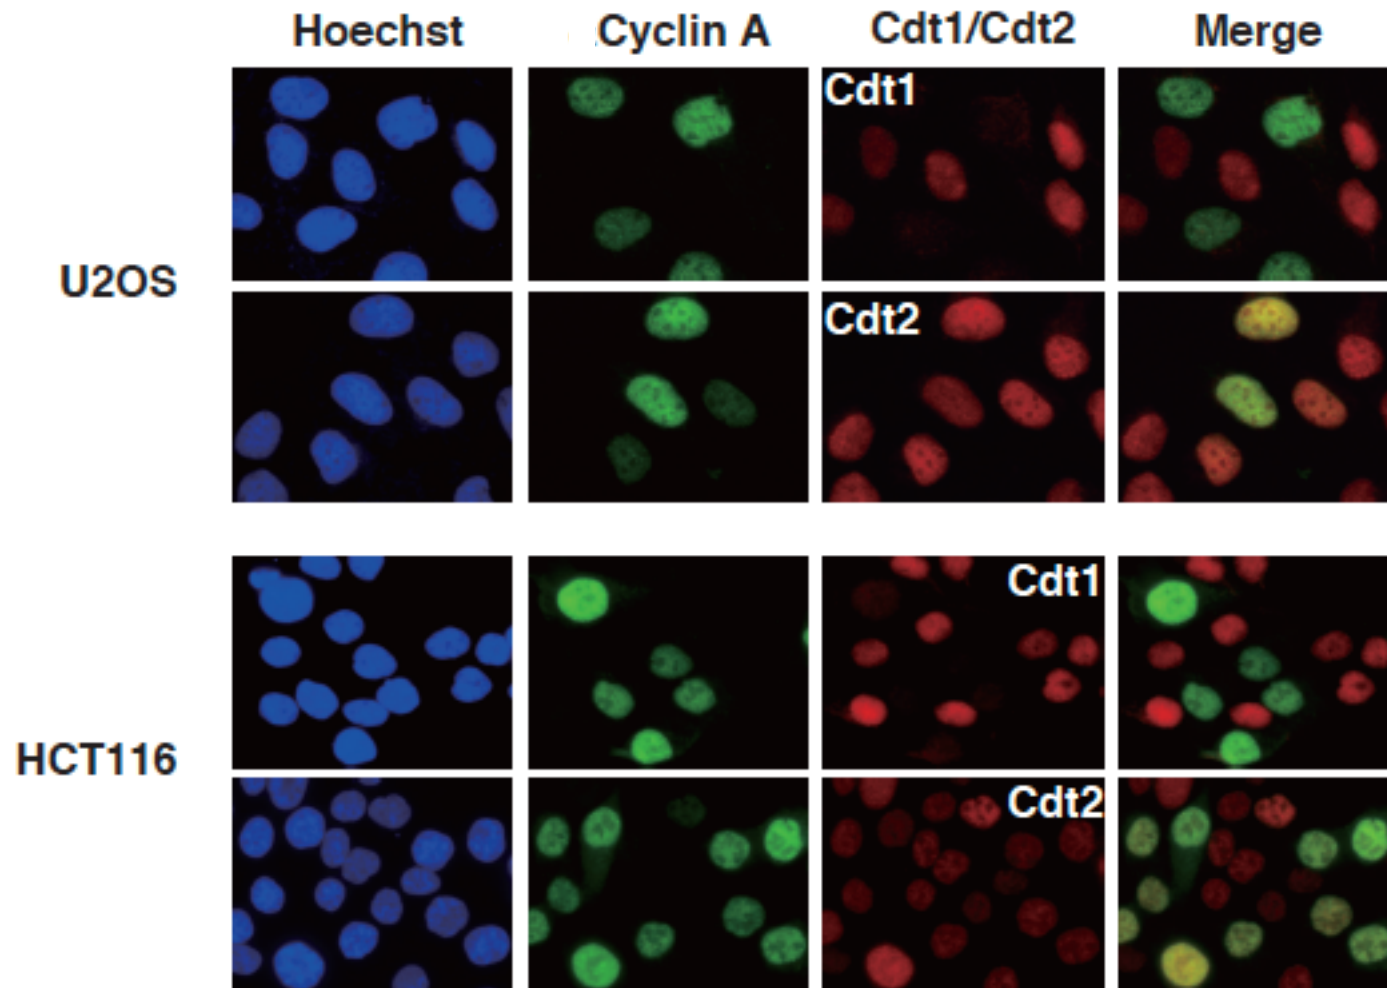

Supplemental Fig.S1

Cdt2 is expressed in all cell cycles. Asynchronously growing U2OS and HCT116 cells were stained with antibodies for Cdt1, Cdt2, and cyclin A.

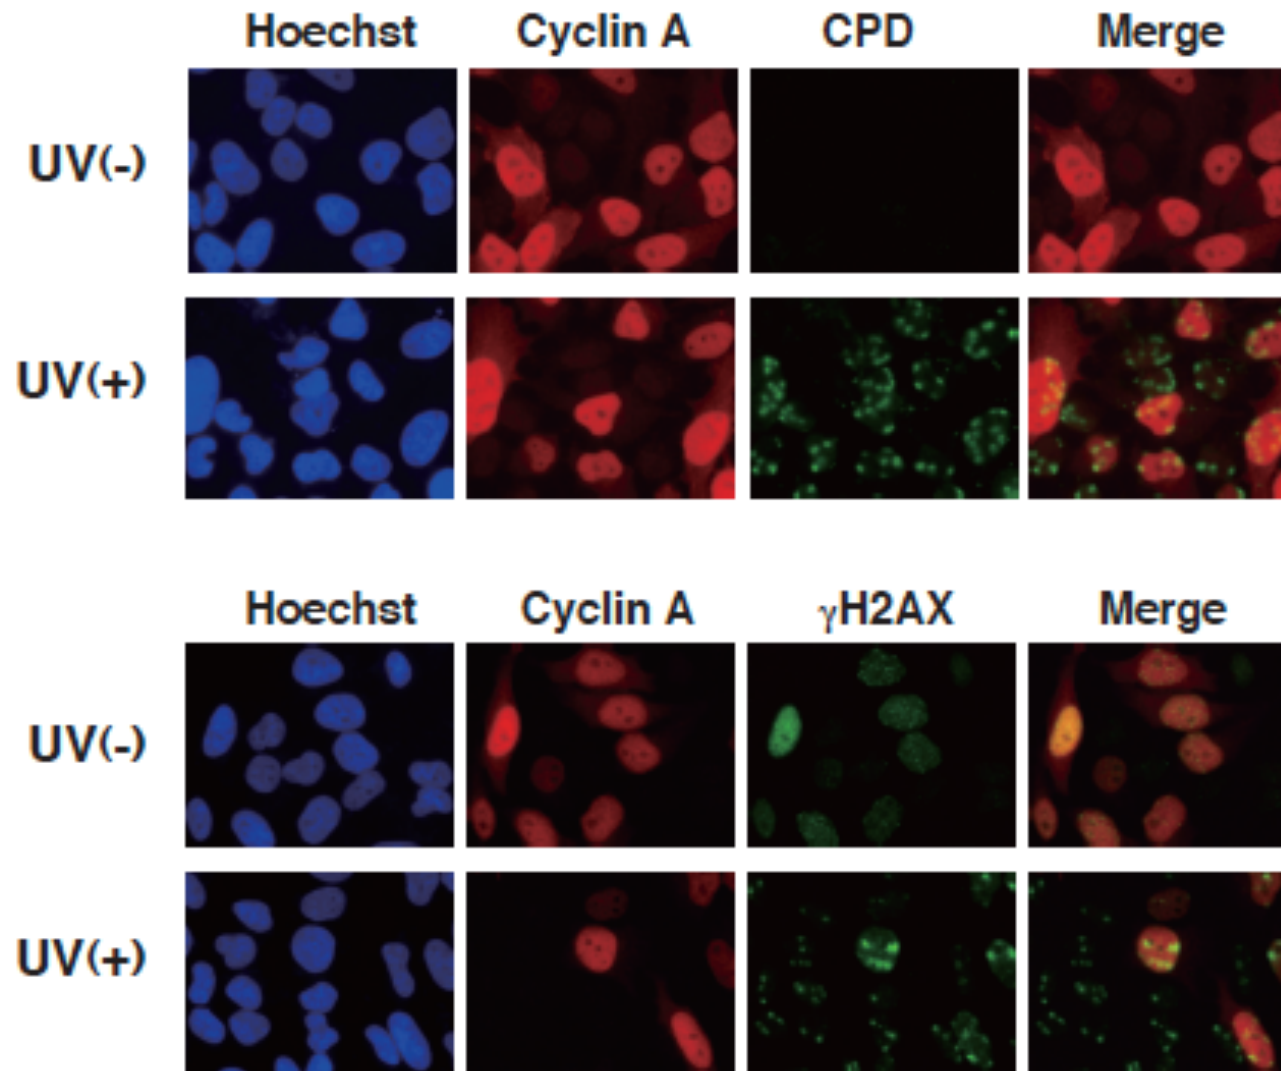

### Supplemental Fig.S2

Micro-pore UV irradiation assay. HeLa cells were covered with isopore polycarbonate membrane and irradiated. One hour later, cells were fixed and stained with antibodies for cyclin A and CPD (upper) or cyclin A and  $\gamma$ H2AX (lower).

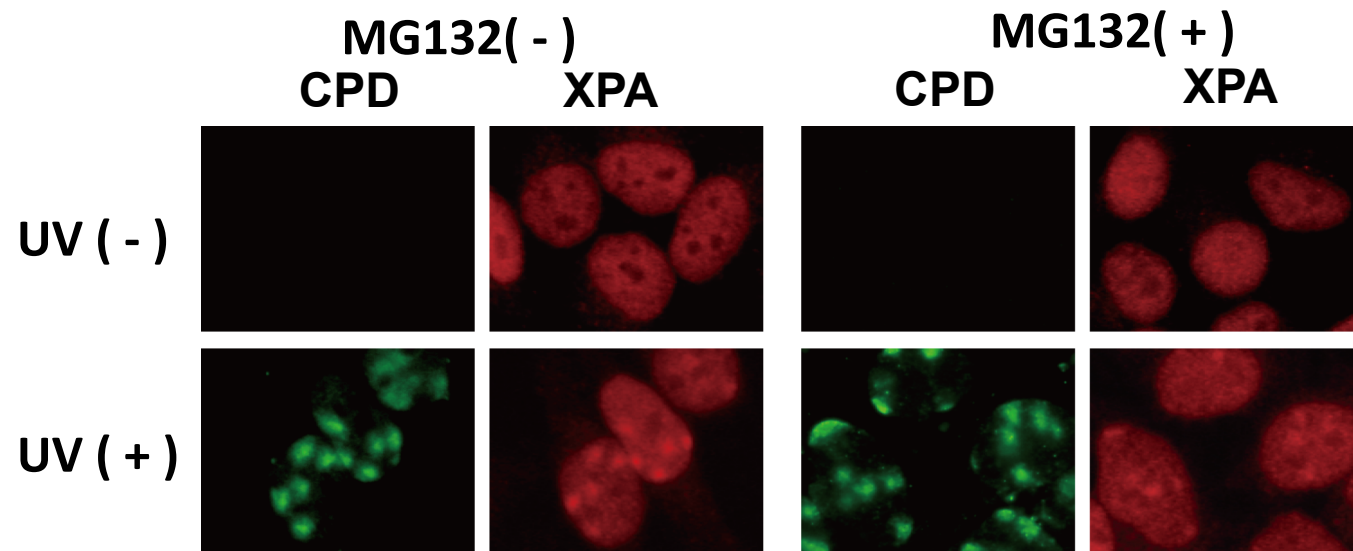

### Supplemental Fig.S3

XPA spot signals at the sites of DNA damage were reduced in MG132-treated cells. HeLa cells treated(MG132 (+) ) or not treated (MG132(-)) with MG132 for 1 hr, were UV – irradiated (UV(+)) through micropore membrane, or not(UV (-)). 30 min later, cells were fixed and stained with antibodies for CPD and XPA.
